# Supplementary material for: Squalene production under oxygen limitation by Schizochytrium sp. S31 in different cultivation systems
Source: Springer Nature journal article supplement (doi:10.1007/s00253-024-13051-3), 2024-02-13
Supplement: MOESM1 [file 253_2024_13051_MOESM1_ESM.pdf]

# Supplementary Information (SI)

Journal: Applied Microbiology and Biotechnology

## Squalene production under oxygen limitation by *Schizochytrium* sp. S31 in different cultivation systems

Lina Schütte<sup>1</sup>\*, Patrick G. Hanisch<sup>2</sup>, Nina Scheler<sup>1</sup>, Katharina C. Haböck<sup>1</sup>, Robert Huber<sup>2</sup>, Franziska Ersoy<sup>1</sup>, Ralf G. Berger<sup>1</sup>

<sup>1</sup> Institute of Food Chemistry, Gottfried Wilhelm Leibniz University Hannover, Hannover, Germany.

<sup>2</sup> Department of Engineering and Management, Munich University of Applied Sciences HM, Munich, Germany.

\*Correspondence: lina.schuette@lci.uni-hannover.de

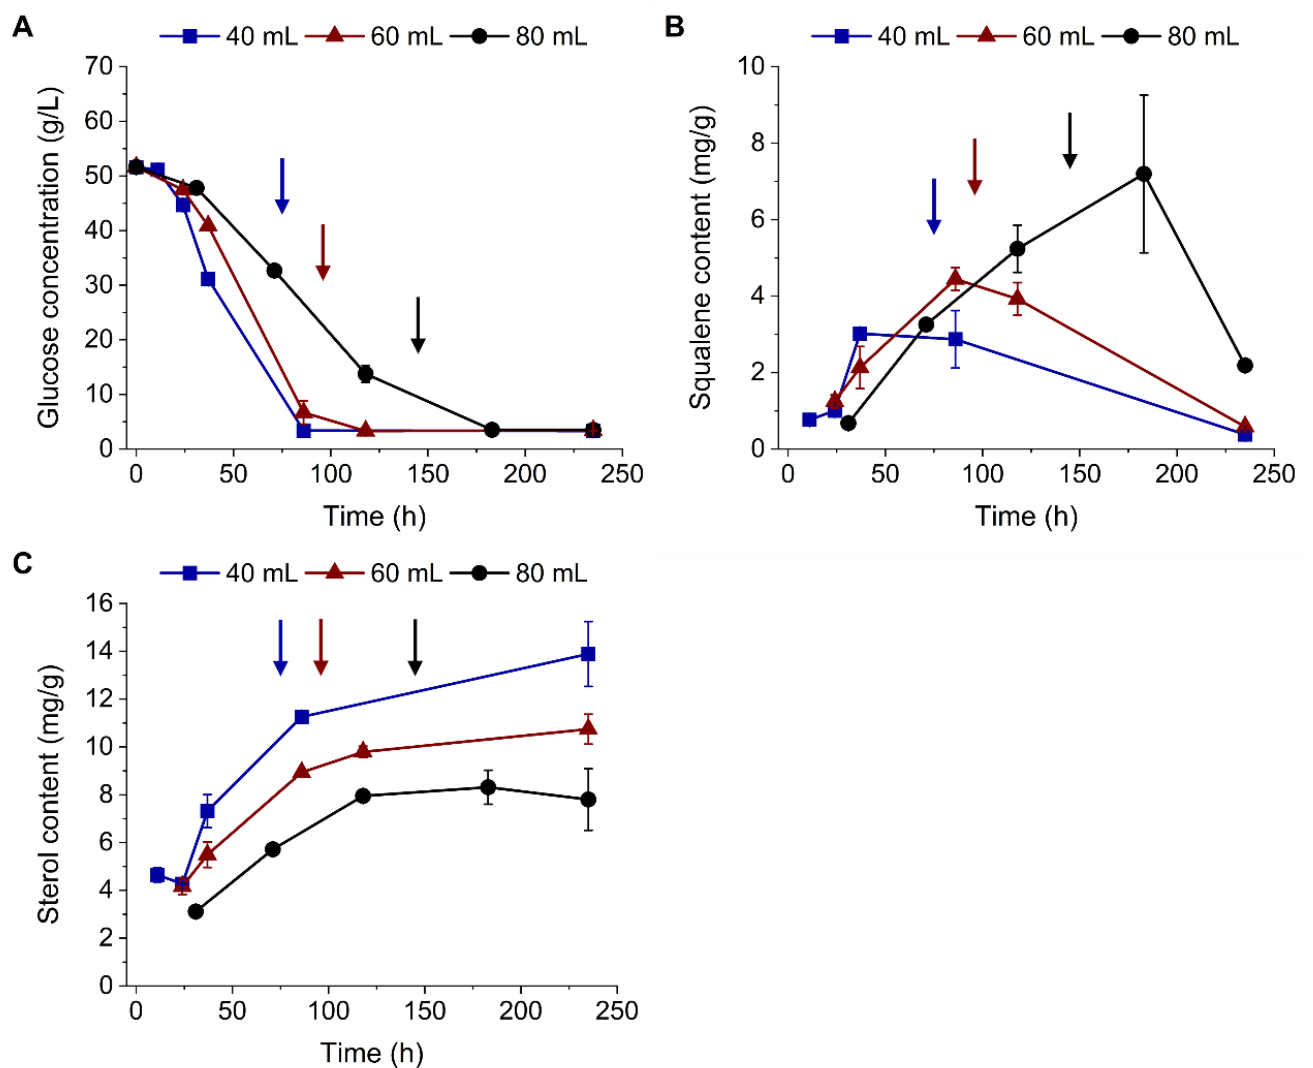

**Fig. S1** Effect of different oxygen transfer rates on biomass formation and squalene/sterol accumulation of *Schizochytrium* sp. S31 in shake flasks with varying filling volumes (blue: 40 mL; red: 60 mL; black: 80 mL). Arrows indicate the start of the stationary phase for each filling volume. (A) Glucose concentration, (B) squalene and (C) sterol content per gramme dry matter over cultivation time. Data presented are the mean of duplicates  $\pm$  standard deviation cultivations
